# Supplementary material
Source: Springer Nature journal article supplement (https://www.springermedizin.de/resource/supplementary/12885_2010_2764_MOESM9_ESM.pdf/9461816)

**A****LNCaP**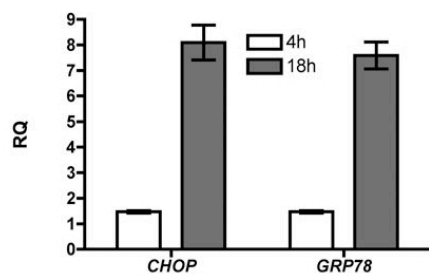**PC3**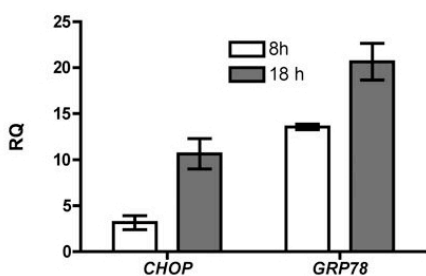**LCN2**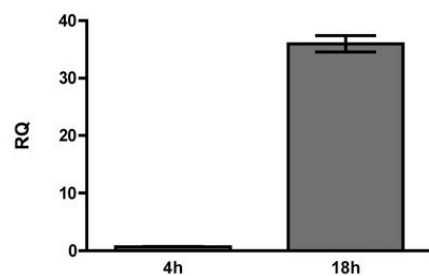**LCN2**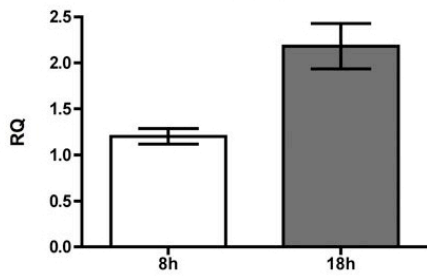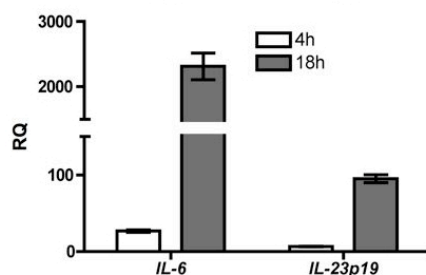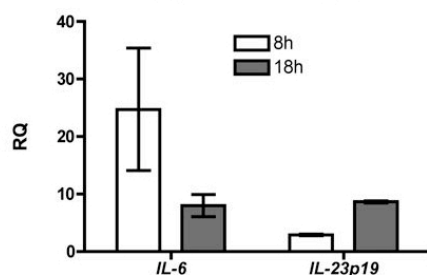**B****GRP78**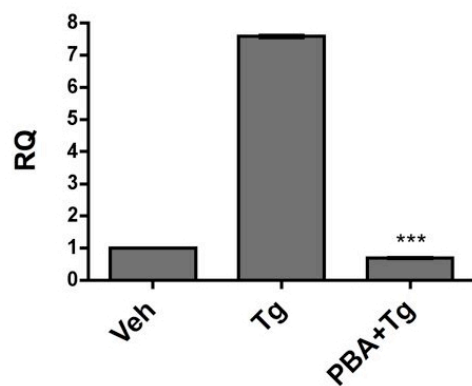**LCN2**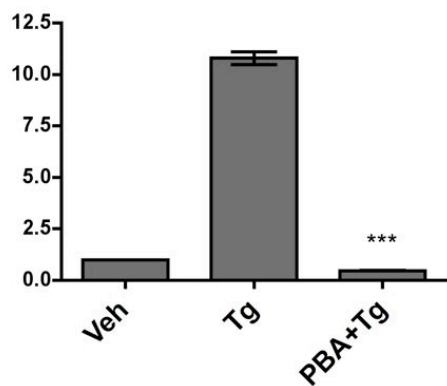**IL-6**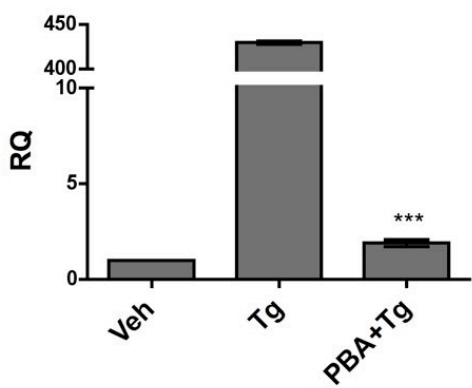**IL-23p19**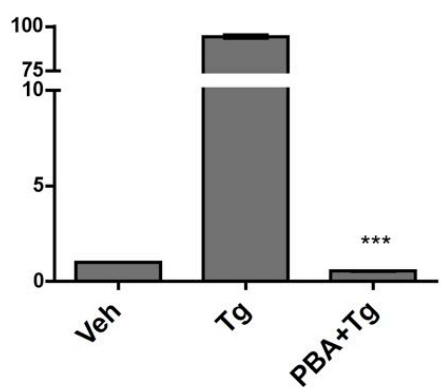

Supplement: MOESM9 [file 9461816]
